# Supplementary material for: Atypical sideways recognition of CD1a by autoreactive γδ T cell receptors
Source: Springer Nature journal article supplement (doi:10.1038/s41467-022-31443-9), 2022-07-05
Supplement: MOESM1 [file 41467_2022_31443_MOESM1_ESM.pdf]

## **Supplementary Information**

### **Atypical sideways recognition of CD1a by autoreactive $\gamma\delta$ T cell receptors**

Marcin Wegrecki<sup>1</sup>, Tonatiuh A. Ocampo<sup>2</sup>, Sachith D. Gunasinghe<sup>1,3</sup>, Anouk von Borstel<sup>1</sup>, Shin Yi Tin<sup>1</sup>, Josephine F. Reijneveld<sup>2,4</sup>, Thinh-Phat Cao<sup>1</sup>, Benjamin S. Gully<sup>1</sup>, Jérôme Le Nours<sup>1</sup>, D. Branch Moody<sup>2\*</sup>, Ildiko van Rhijn<sup>2,4\*</sup> & Jamie Rossjohn<sup>1,5\*</sup>

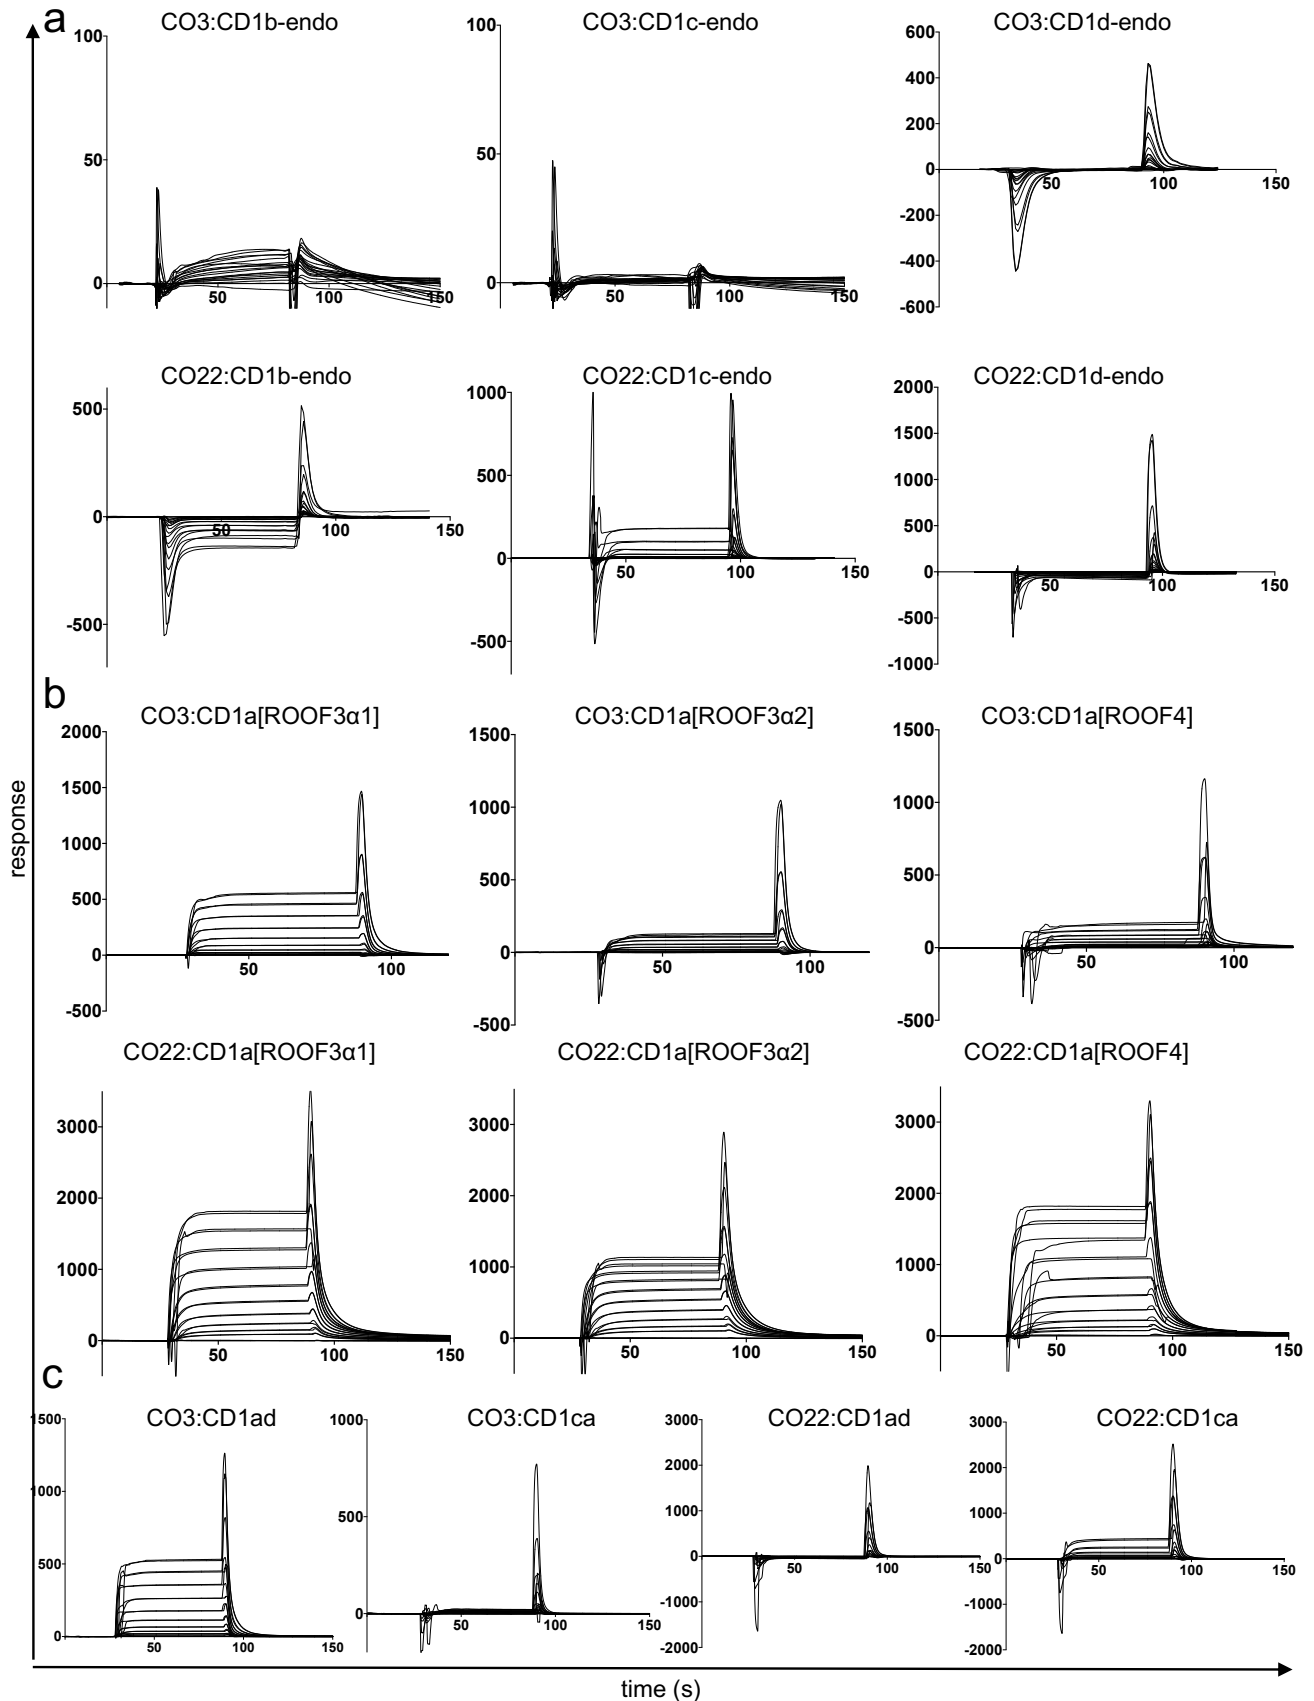

**Supplementary Figure S1.** Surface plasmon resonance sensorgrams corresponding to the serial injections of CO3 and CO22  $\gamma\delta$ TCRs injected over a flow cell containing different human CD1 isoforms (a), multiple mutants across the A' roof of human CD1a (b), or CD1- $\alpha$ 3 domain chimeras (c). Source data are provided as a Source Data file.

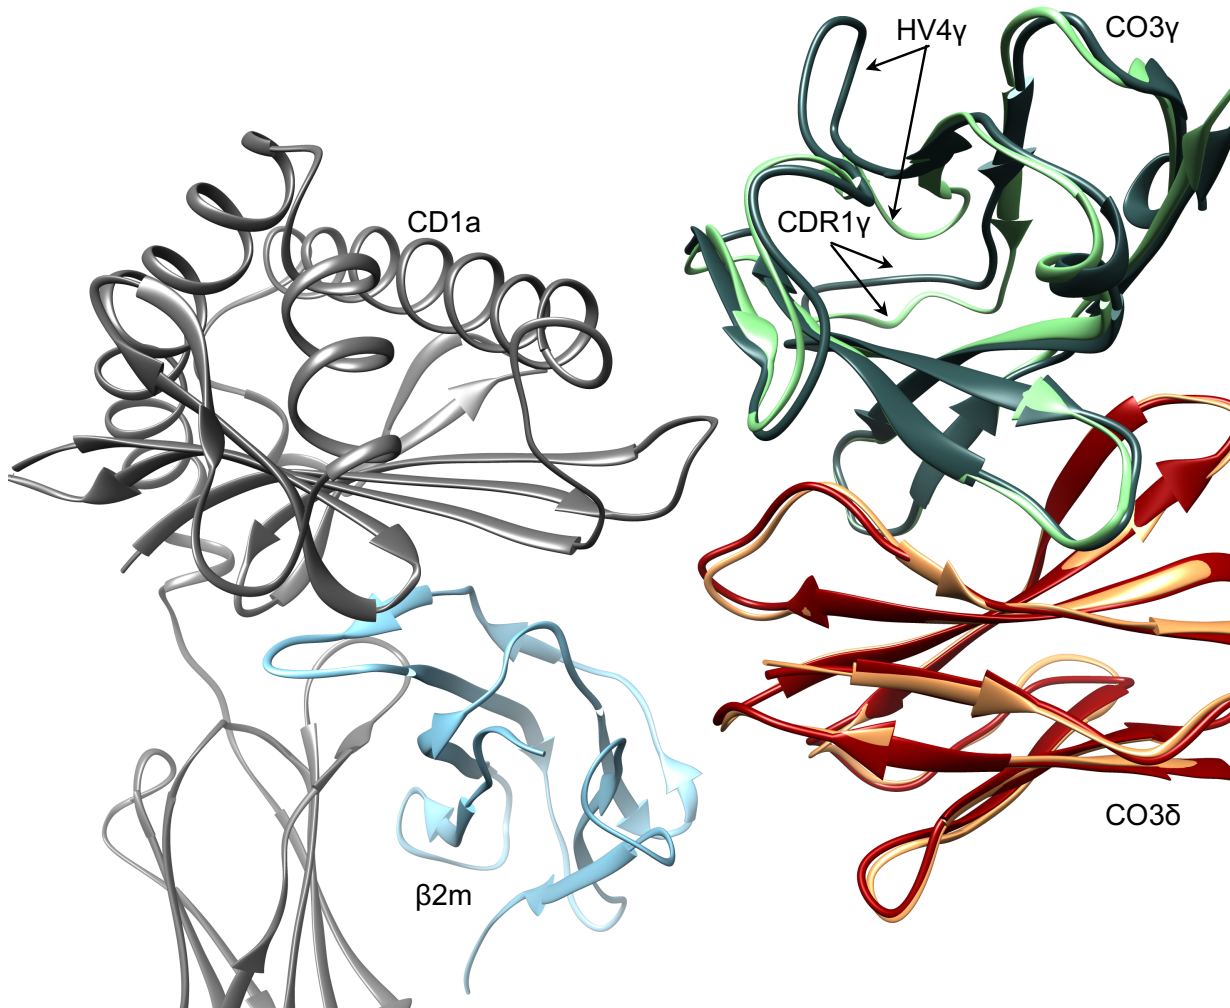

**Supplementary Figure S2.** Comparison of the binary crystal structure of CO3  $\gamma\delta$ TCR ( $\gamma$  chain dark green,  $\delta$  chain dark red) and the structure of CO3 bound to CD1a ( $\gamma$  chain green,  $\delta$  chain orange) shows no major structural rearrangements within the area of the TCR involved in the complex formation. The most prominent conformational differences between CD1a-bound and TCR binary structures reside within CDR1 $\gamma$  loop and HV4 region of CO3  $\gamma\delta$ TCR (arrows) that do not make contacts with CD1a.

```

TRGV2 MQWALA-VLLAFLSP-ASQK3SSNLEGRTKSVIRQTGSSAEITCDLA--EGSNGYIHWYLHQE42
TRGV3 MRWALL-VLLAFLSP-ASQKSSNLEGRTKSVTRQTGSSAEITCDLT--VTNTFYIHWYLHQE
TRGV4 MQWALA-VLLAFLSP-ASQKSSNLEGRTKSVIRQTGSSAEITCDLA--EGSTGYIHWYLHQE
TRGV5 MRWALL-VLLAFLSP-ASQKSSNLEGGTKSVTRPTRSSAEITCDLT--VINAFYIHWYLHQE
TRGV8 MLLALA-LLLAFLPP-ASQKSSNLEGRTKSVTRPTGSSAVITCDLP--VENAVYTHWYLHQE
TRGV9 MSLLLHTSTLAVLGALCVYGAGHLEQPQISSTKTLSTARLECVVSGITISATSVYWYRERP

TRGV2 GKAPQR48LQY51YDSYNSKVVLES61GVSPG62KYYTY-ASTRNNLRLILRNL102IENDFGVYYCATWDG
TRGV3 GKAPQRLLLYDVSTARDVLESGLSPGKYYTH-TPRRSWILRLQNLIENDSGVYYCATWDR
TRGV4 GKAPQRLLLYDSYTSSVVLESGLSPGKYDTY-GSTRKNLRMILRNLIENDSGVYYCATWDG
TRGV5 GKAPQRLLLYDVSNSKDVLESGLSPGKYYTH-TPRRSWILILRNLIENDSGVYYCATWDR
TRGV8 GKAPQRLLLYDSYNSRVVLESGLSREKYHTY-ASTGKSLKFIENLIERDSGVYYCATWDR
TRGV9 GEVIQELVLS-61ISYDGTVRKES62IPSGKFEVDRIPETSTSTLTIHNVEKQDIATYYCALWEV

```

**Supplementary Figure S3.** Sequence alignment of the functional human TRGV gene products. Fully conserved residues are highlighted in green. The position and numbering of the FR $\gamma$  residues in CO3  $\gamma\delta$ TCR interacting with CD1a-sulfatide are shown in red boxes.



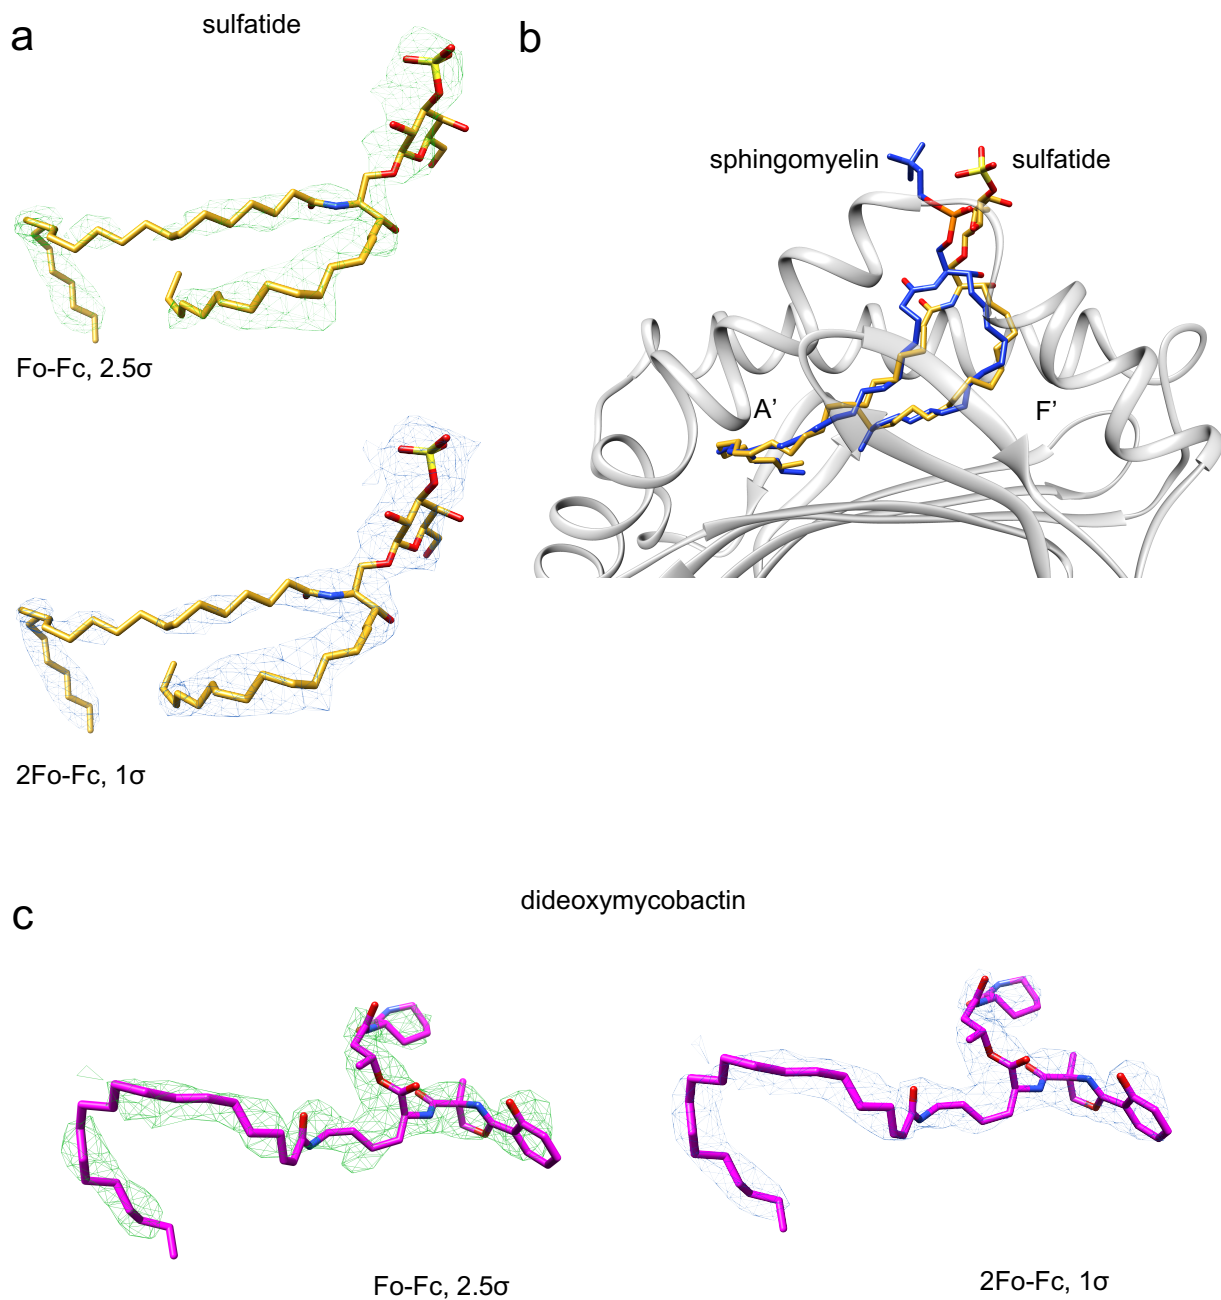

**Supplementary Figure S4.** Electron density maps for lipid ligand in the cleft of CD1a **a**) Unbiased (Fo-Fc at  $2.5\sigma$ , green) and refined (2Fo-Fc at  $1.0\sigma$ , blue) electron density maps for 24:1 sulfatide (yellow) in the cleft of CD1a from the CO3:CD1a-sulfatide ternary complex structures. **b**) Superimposition of 42:2 sphingomyelin (navy blue) and sulfatide (yellow) in the binding cleft of CD1a (grey) showing similarities in relative orientation of the lipid tails and the headgroup of the lipid antigen. **c**) Unbiased (Fo-Fc at  $2.5\sigma$ , green) and refined (2Fo-Fc at  $1.0\sigma$ , blue) electron density maps for dideoxymycobactin (magenta) in the cleft of CD1a in the CO3:CD1a-dideoxymycobactin ternary complex structures.

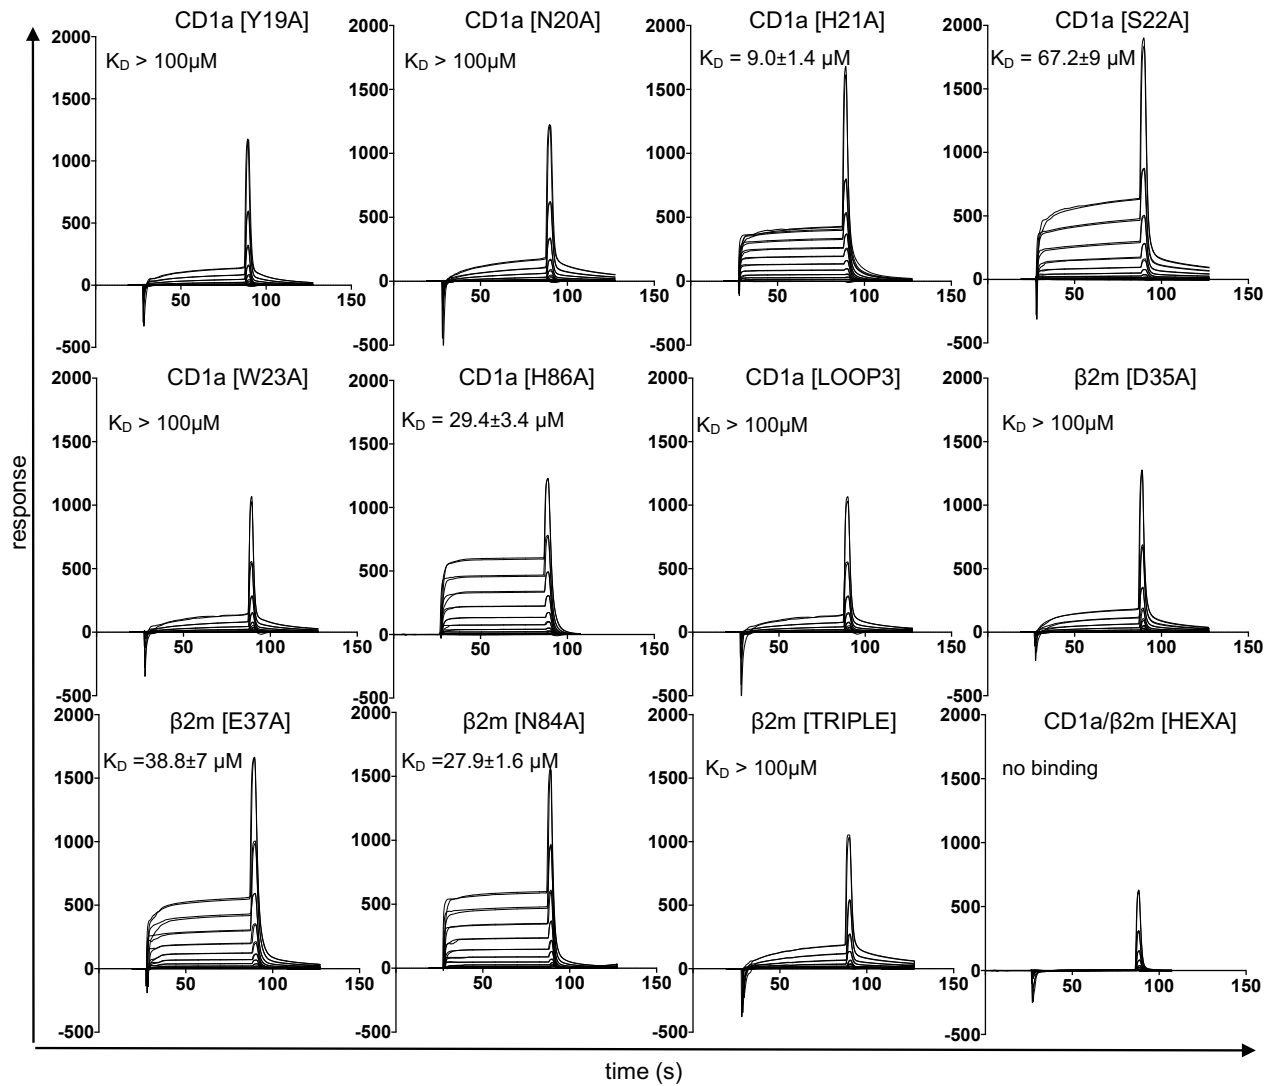

**Supplementary Figure S5.** SPR sensorgrams for serial injections of CO3  $\gamma\delta$ TCR from 0 to 100  $\mu$ M over a flow cell containing the variant of CD1a/ $\beta$ 2m indicated for each panel. The sensorgrams represent one experiment, in which two independent injections of each TCR sample were performed. The  $K_D$  was calculated from two independent experiments. Source data are provided as a Source Data file.

a

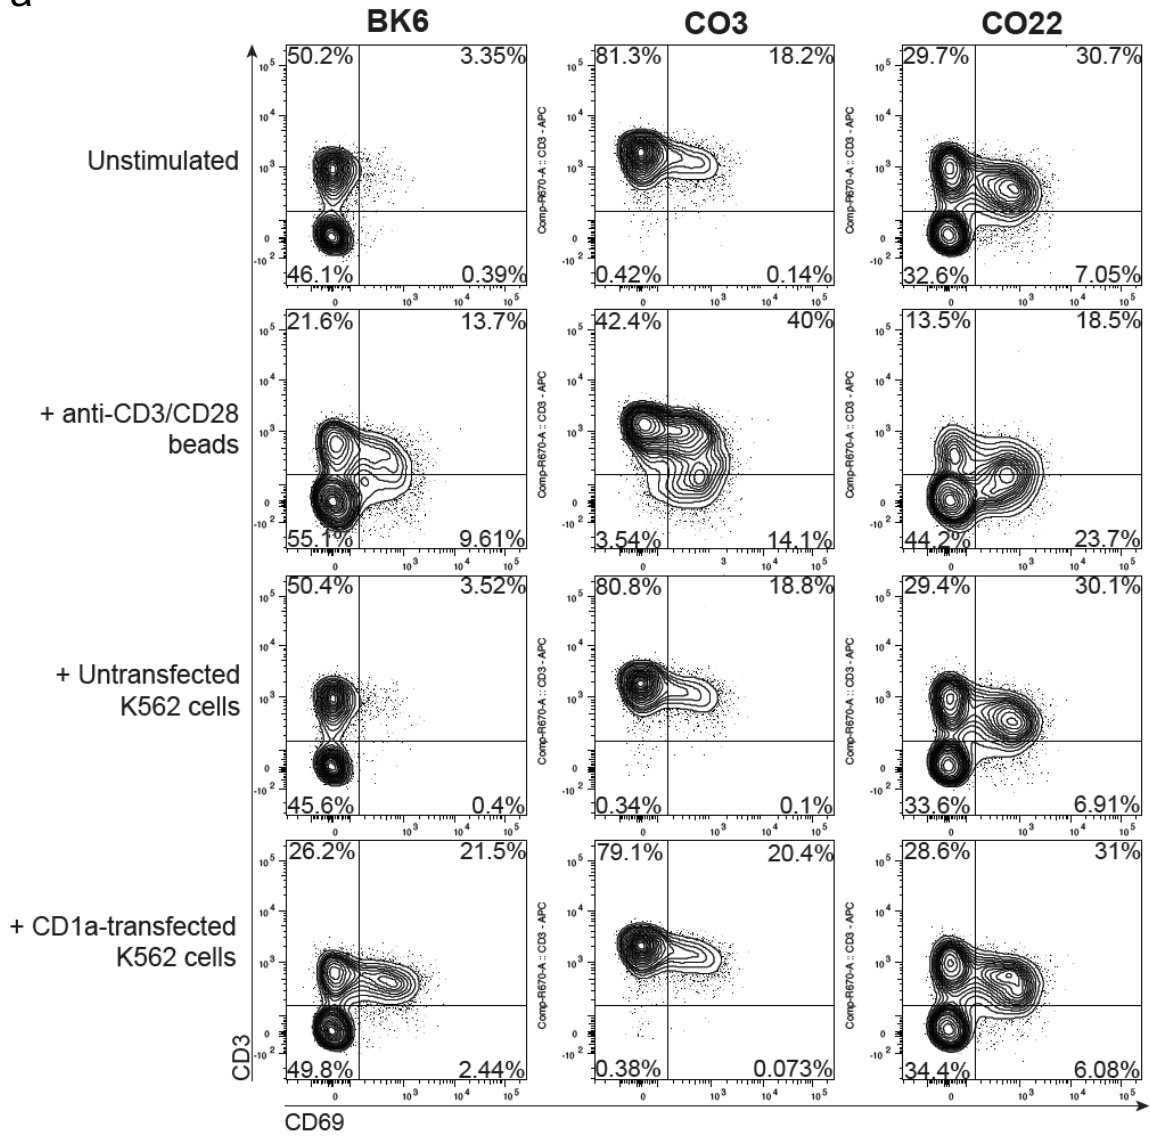

b

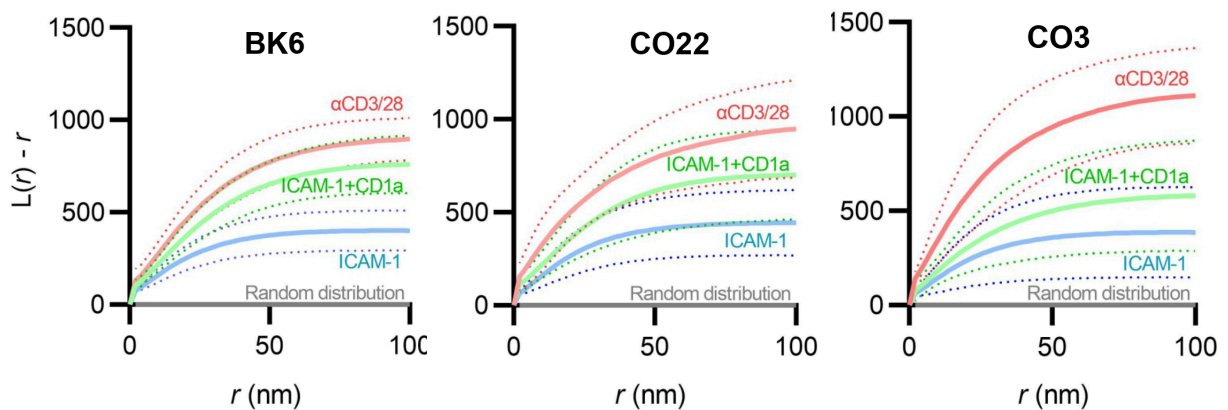

**Supplementary Figure S6.** Functional analysis of Jurkat76 cells expressing CD1a-restricted TCRs. **a)** The level of CD69 expression on transduced Jurkat76 cell lines was analysed by flow cytometry upon stimulation of cells with either CD3/CD28 dynabeads, or co-culture with CD1a<sup>+</sup> K562 cells or K562 cells stably expressing CD1a. The cells were gated as shown in **Supplementary Fig. S7**. Each activation assay was performed at least twice in two independent experiments. **b)** Ripley's K analysis of CD3 $\epsilon$  clustering  $[L(r)-r]$  against radii ( $r$ ). Complete spatial randomness is shown as a solid grey line where  $L(r)-r = 0$ . Positive  $L(r)-r$  values indicate molecular clustering (ICAM-1 in blue, ICAM1+CD1a in green, and anti-CD3/CD28 in red) relative to the random distribution, shown as the mean (solid line)  $\pm 95\%$  confidence interval (dashed lines). Dotted lines indicate  $\pm$  SEM. Experiments were performed in triplicates. Source data are provided as a Source Data file.

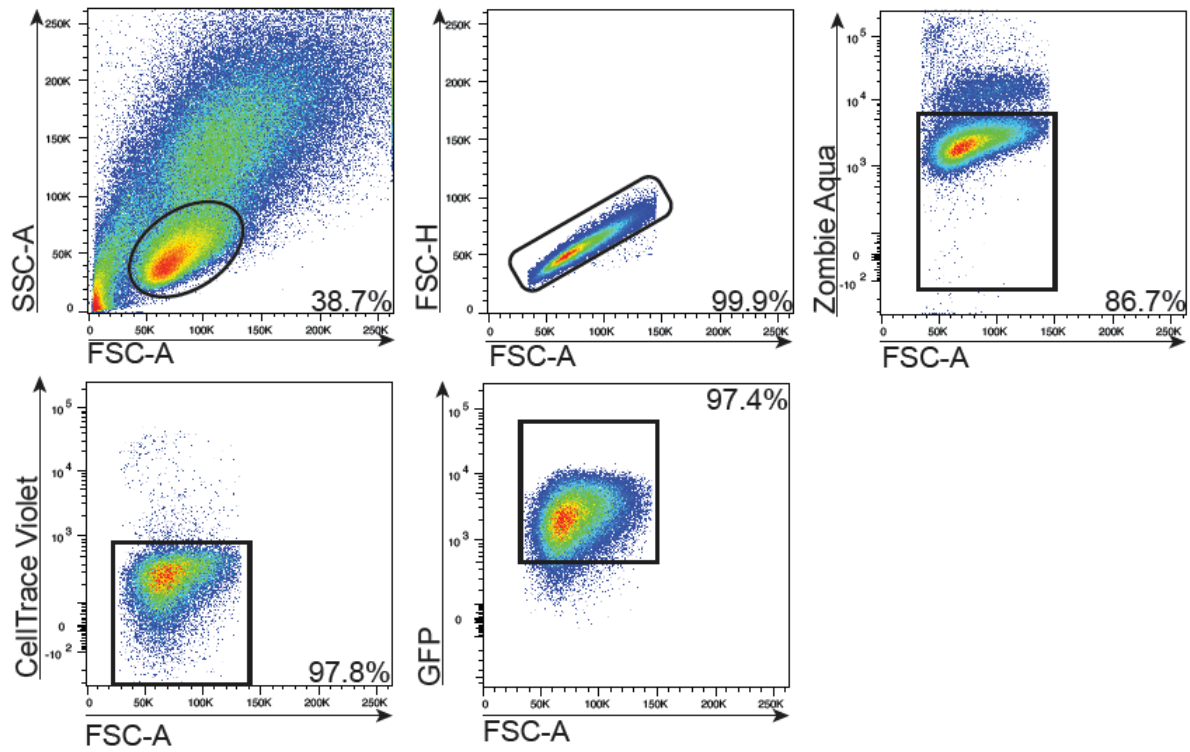

**Supplementary Figure S7.** Gating strategy used in the CD3/CD69 analysis of Jurkat76 cell lines stably expressing CD1a-restricted  $\alpha\beta$ TCR (BK6) or  $\gamma\delta$ TCRs (CO3 and CO22) shown in **Supplementary Fig. S6a**.

**Supplementary Table 1.** Binding affinity values calculated using surface plasmon resonance between  $\gamma\delta$ TCRs and CD1a carrying endogenous or defined lipid antigens.

|                                     | CO3 K <sub>D</sub> ( $\mu$ M) | CO22 K <sub>D</sub> ( $\mu$ M) |
|-------------------------------------|-------------------------------|--------------------------------|
| CD1a-endogenous (endo)              | 23.6 $\pm$ 3.1                | 15.5 $\pm$ 0.2                 |
| CD1a-lyso-phosphatidylcholine (LPC) | 16.3 $\pm$ 3.0                | 11.8 $\pm$ 5.2                 |
| CD1a-C42:2 sphingomyelin (42:2 SM)  | 15.2 $\pm$ 0.2                | 10.3 $\pm$ 5.7                 |
| CD1a-sulfatide (SLF)                | 21.9 $\pm$ 4.8                | 13.1 $\pm$ 0.7                 |
| CD1a-dideoxymycobactin (DDM)        | 8.7 $\pm$ 1                   | 11.4 $\pm$ 0.8                 |

**Supplementary Table 2.** Data collection and refinement statistics on CD1a-CO3  $\gamma\delta$ TCR complexes.

|                                      | CO3:CD1a-endo      | CO3:CD1a-sulfatide | CO3:CD1a-DDM       | CO3 $\gamma\delta$ TCR binary                  |
|--------------------------------------|--------------------|--------------------|--------------------|------------------------------------------------|
| <b>Data collection statistics</b>    |                    |                    |                    |                                                |
| Temperature (K)                      | 100                | 100                | 100                | 100                                            |
| Wavelength (Å)                       | 0.954              | 0.954              | 0.954              | 0.954                                          |
| Resolution Range (Å)                 | 38.4-3.2 (3.3-3.2) | 42.9-2.7 (2.8-2.7) | 43.9-3.0 (3.2-3.0) | 45.5-2.0 (2.1-2.0)                             |
| Space group                          | C2                 | C2                 | C2                 | P 2 <sub>1</sub> 2 <sub>1</sub> 2 <sub>1</sub> |
| Unit cell                            |                    |                    |                    |                                                |
| a, b, c (Å)                          | 237.1, 42.5, 121.6 | 234.7, 42.2, 123.1 | 234.9, 42.3, 124.7 | 51.0, 76.4, 113.2                              |
| $\alpha$ , $\beta$ , $\gamma$ (°)    | 90.0, 116.1, 90    | 90.0, 114.3, 90.0  | 90, 113.4, 90      | 90.0, 90.0, 90.0                               |
| Total reflections                    | 127129 (13075)     | 352643 (46120)     | 158475 (26171)     | 208255 (15218)                                 |
| Unique reflections                   | 18546 (1832)       | 31003 (4097)       | 23043 (3638)       | 30668 (2241)                                   |
| Multiplicity                         | 6.9 (7.1)          | 11.4 (11.3)        | 6.9 (7.2)          | 6.8 (6.8)                                      |
| Completeness (%)                     | 99.6 (99.5)        | 99.9 (99.6)        | 99.7 (99.6)        | 100 (100)                                      |
| Mean I/ $\sigma$ <sub>1</sub>        | 12.4 (2.4)         | 14.2 (2.9)         | 6.5 (1.6)          | 10.3 (1.6)                                     |
| R <sub>p.i.m.</sub> <sup>1</sup> (%) | 7.1 (36.3)         | 3.1 (25.5)         | 10 (57.9)          | 5.8 (74.3)                                     |
| Wilson B-factor (Å <sup>2</sup> )    | 81.3               | 60.4               | 62.4               | 30.7                                           |
| <b>Refinement statistics</b>         |                    |                    |                    |                                                |
| R <sub>work</sub> <sup>2</sup> (%)   | 24.7               | 23.2               | 22.2               | 19.9                                           |
| R <sub>free</sub> <sup>3</sup> (%)   | 28.6               | 26.9               | 26.7               | 24.7                                           |
| Non-hydrogen atoms                   | 5542               | 6091               | 6288               | 3746                                           |
| macromolecules                       | 5530               | 5961               | 6215               | 3441                                           |
| ligands                              | 12                 | 116                | 73                 | 14                                             |
| solvent                              | 0                  | 14                 | 0                  | 291                                            |
| Protein residues                     | 732                | 781                | 806                | 432                                            |
| rmsd bonds (Å)                       | 0.002              | 0.002              | 0.002              | 0.003                                          |
| rmsd angles (°)                      | 0.63               | 0.60               | 0.60               | 0.64                                           |
| Ramachandran                         |                    |                    |                    |                                                |
| favored (%)                          | 93.5               | 96.1               | 92.3               | 95.8                                           |
| allowed (%)                          | 6.3                | 3.9                | 6.5                | 3.8                                            |
| outliers (%)                         | 0.2                | 0.0                | 0.5                | 0.4                                            |
| Average B-factor (Å <sup>2</sup> )   | 128                | 100                | 79                 | 40                                             |
| protein                              | 128                | 100                | 79                 | 40                                             |
| ligand                               | 99                 | 91                 | 67                 | 55                                             |
| water                                | -                  | 63                 | -                  | 40                                             |

Statistics for the highest-resolution shell are shown in parentheses.

$$^1R_{p.i.m.} = \sum_{hkl} [1/(N-1)]^{1/2} \sum_i |I_{hkl,i} - \langle I_{hkl} \rangle| / \sum_{hkl} \langle I_{hkl} \rangle$$

$$^2R_{work} = (\sum ||F_o| - |F_c||) / (\sum |F_o|) - \text{for all data except as indicated in footnote 3.}$$

<sup>3</sup>5% of data was used for the R<sub>free</sub> calculation

**Supplementary Table 3.** CO3 TCR contacts with CD1a/ $\beta$ 2m

| TCR gene      | TCR residues         | CD1a residues                     | Bond type              |
|---------------|----------------------|-----------------------------------|------------------------|
| CDR3 $\gamma$ | Tyr104               | Trp23                             | VDW                    |
| FR $\gamma$   | Arg48                | His21                             | VDW                    |
| FR $\gamma$   | Tyr51                | His21, Ser22                      | VDW                    |
| FR $\gamma$   | Leu61                | His21                             | VDW                    |
| FR $\gamma$   | Glu62                | His21                             | VDW                    |
| FR $\gamma$   | Ser63                | His86                             | VDW                    |
| CDR3 $\delta$ | Glu96-O $\epsilon$ 1 | Asn20-N $\delta$ 2                | HB                     |
| CDR3 $\delta$ | Glu96                | Asn20                             | VDW                    |
| CDR3 $\delta$ | Trp99-O              | Asn20-N $\delta$ 2                | HB                     |
| CDR3 $\delta$ | Trp99                | Tyr19                             | $\pi$ - $\pi$ stacking |
| CDR3 $\delta$ | Trp99                | Tyr19, Asn20, Trp23               | VDW                    |
| CDR3 $\delta$ | Pro100-O             | Trp23-N $\epsilon$ 1              | HB                     |
| CDR3 $\delta$ | Pro100               | Trp23                             | VDW                    |
| CDR3 $\delta$ | Asp101-O $\delta$ 1  | Ser22-O $\gamma$                  | HB                     |
| CDR3 $\delta$ | Asp101               | Asn20, His21, Ser22               | VDW                    |
| TCR gene      | TCR residues         | $\beta$ 2m residues               | Bond type              |
| CDR1 $\delta$ | Trp31                | Asp35, Glu37, Asn84, His85, Val86 | VDW                    |
| CDR3 $\delta$ | Arg98-N $\epsilon$   | Asp35-O $\delta$ 2                | HB                     |
| CDR3 $\delta$ | Arg98-N $\eta$ 2     | Asp35-O $\delta$ 1                | HB                     |
| CDR3 $\delta$ | Arg98                | Asp35, Glu37                      | VDW                    |
| CDR3 $\delta$ | Trp99-N              | Asp35-O $\delta$ 1                | HB                     |
| CDR3 $\delta$ | Trp99                | Asp35                             | VDW                    |

HB: Hydrogen bond, VDW: Van der Waals. Cut-off at 4 Å for VDW interactions and 3.5 Å for HB. FR, framework. Calculated using CCP4 contacts.

**Supplementary Table 4.** Exact values of the P values shown in Fig 7 c, d and e. The values were calculated using one-way ANOVA.

|                  |                                                      | Exact P value                       | P value stars |
|------------------|------------------------------------------------------|-------------------------------------|---------------|
| <b>Figure 7c</b> | TCR clusters per area                                | BK6-(ICAM-1) vs BK6-(ICAM-1+CD1a)   |               |
|                  |                                                      | CO22-(ICAM-1) vs CO22-(ICAM-1+CD1a) | 2.51E-18 **** |
|                  |                                                      | CO3-(ICAM-1) vs CO3-(ICAM-1+CD1a)   | 2.51E-18 **** |
|                  |                                                      |                                     |               |
| <b>Figure 7c</b> | TCR cluster area                                     | BK6-(ICAM-1) vs BK6-(ICAM-1+CD1a)   | 0.0949 ns     |
|                  |                                                      | CO22-(ICAM-1) vs CO22-(ICAM-1+CD1a) | 4.03E-07 **** |
|                  |                                                      | CO3-(ICAM-1) vs CO3-(ICAM-1+CD1a)   | 0.9999 ns     |
|                  |                                                      |                                     |               |
| <b>Figure 7c</b> | TCR localizations per cluster                        | BK6-(ICAM-1) vs BK6-(ICAM-1+CD1a)   | 0.1344 ns     |
|                  |                                                      | CO22-(ICAM-1) vs CO22-(ICAM-1+CD1a) | 4.54E-05 **** |
|                  |                                                      | CO3-(ICAM-1) vs CO3-(ICAM-1+CD1a)   | 0.9998 ns     |
|                  |                                                      |                                     |               |
| <b>Figure 7d</b> | pCD3zeta clusters per area                           | BK6-(ICAM-1) vs BK6-(ICAM-1+CD1a)   | 0.8302 ns     |
|                  |                                                      | CO22-(ICAM-1) vs CO22-(ICAM-1+CD1a) | 1.46E-15 **** |
|                  |                                                      | CO3-(ICAM-1) vs CO3-(ICAM-1+CD1a)   | 0.9693 ns     |
|                  |                                                      |                                     |               |
| <b>Figure 7d</b> | pCD3zeta cluster area                                | BK6-(ICAM-1) vs BK6-(ICAM-1+CD1a)   | 1.21E-18 **** |
|                  |                                                      | CO22-(ICAM-1) vs CO22-(ICAM-1+CD1a) | 1.21E-18 **** |
|                  |                                                      | CO3-(ICAM-1) vs CO3-(ICAM-1+CD1a)   | 1.21E-18 **** |
|                  |                                                      |                                     |               |
| <b>Figure 7e</b> | Proportion of TCR-pCD3z clusters above DoC threshold | BK6-(ICAM-1) vs BK6-(ICAM-1+CD1a)   | 3.57E-08 **** |
|                  |                                                      | CO22-(ICAM-1) vs CO22-(ICAM-1+CD1a) | 3.57E-08 **** |
|                  |                                                      | CO3-(ICAM-1) vs CO3-(ICAM-1+CD1a)   | 3.57E-08 **** |
