# Supplementary material for: Atypical sideways recognition of CD1a by autoreactive γδ T cell receptors
Source: Nat Commun. 2022 Jul 5;13:3872. doi: 10.1038/s41467-022-31443-9 (PMC9256601; doi:10.1038/s41467-022-31443-9)
Supplement: Supplementary file 2 — Reporting Summary [file 41467_2022_31443_MOESM2_ESM.pdf]

Corresponding author(s): Moody, van Rhijn & RossjohnLast updated by author(s): May 12, 2022

## Reporting Summary

Nature Portfolio wishes to improve the reproducibility of the work that we publish. This form provides structure for consistency and transparency in reporting. For further information on Nature Portfolio policies, see our [Editorial Policies](#) and the [Editorial Policy Checklist](#).

### Statistics

For all statistical analyses, confirm that the following items are present in the figure legend, table legend, main text, or Methods section.

n/a Confirmed

- |                                     |                                     |                                                                                                                                                                                                                                                            |
|-------------------------------------|-------------------------------------|------------------------------------------------------------------------------------------------------------------------------------------------------------------------------------------------------------------------------------------------------------|
| <input type="checkbox"/>            | <input checked="" type="checkbox"/> | The exact sample size ( <i>n</i> ) for each experimental group/condition, given as a discrete number and unit of measurement                                                                                                                               |
| <input type="checkbox"/>            | <input checked="" type="checkbox"/> | A statement on whether measurements were taken from distinct samples or whether the same sample was measured repeatedly                                                                                                                                    |
| <input type="checkbox"/>            | <input checked="" type="checkbox"/> | The statistical test(s) used AND whether they are one- or two-sided<br><i>Only common tests should be described solely by name; describe more complex techniques in the Methods section.</i>                                                               |
| <input checked="" type="checkbox"/> | <input type="checkbox"/>            | A description of all covariates tested                                                                                                                                                                                                                     |
| <input type="checkbox"/>            | <input checked="" type="checkbox"/> | A description of any assumptions or corrections, such as tests of normality and adjustment for multiple comparisons                                                                                                                                        |
| <input type="checkbox"/>            | <input checked="" type="checkbox"/> | A full description of the statistical parameters including central tendency (e.g. means) or other basic estimates (e.g. regression coefficient) AND variation (e.g. standard deviation) or associated estimates of uncertainty (e.g. confidence intervals) |
| <input type="checkbox"/>            | <input checked="" type="checkbox"/> | For null hypothesis testing, the test statistic (e.g. <i>F</i> , <i>t</i> , <i>r</i> ) with confidence intervals, effect sizes, degrees of freedom and <i>P</i> value noted<br><i>Give P values as exact values whenever suitable.</i>                     |
| <input checked="" type="checkbox"/> | <input type="checkbox"/>            | For Bayesian analysis, information on the choice of priors and Markov chain Monte Carlo settings                                                                                                                                                           |
| <input checked="" type="checkbox"/> | <input type="checkbox"/>            | For hierarchical and complex designs, identification of the appropriate level for tests and full reporting of outcomes                                                                                                                                     |
| <input checked="" type="checkbox"/> | <input type="checkbox"/>            | Estimates of effect sizes (e.g. Cohen's <i>d</i> , Pearson's <i>r</i> ), indicating how they were calculated                                                                                                                                               |

*Our web collection on [statistics for biologists](#) contains articles on many of the points above.*

### Software and code

Policy information about [availability of computer code](#)

Data collection

The link to custom-build cluster analysis algorithm used in this study is available at GitHub repository link (<https://github.com/PRNicovich/ClusDoC>) which was originally published by Paeon et al., Mol Biol Cell 2016

Data analysis

All statistical analysis was done using GraphPad Prism software version 9.3.1. Crystallographic data were processed and analysed in XDS, CCP4 (4.71) and Phenix (1.19.2) software suites. SPR data were analysed using Scrubber 2. Flow cytometry data were analysed in FlowJo version 10.8.1.

For manuscripts utilizing custom algorithms or software that are central to the research but not yet described in published literature, software must be made available to editors and reviewers. We strongly encourage code deposition in a community repository (e.g. GitHub). See the Nature Portfolio [guidelines for submitting code & software](#) for further information.

### Data

Policy information about [availability of data](#)

All manuscripts must include a [data availability statement](#). This statement should provide the following information, where applicable:

- Accession codes, unique identifiers, or web links for publicly available datasets
- A description of any restrictions on data availability
- For clinical datasets or third party data, please ensure that the statement adheres to our [policy](#)

The structure factors and PDB coordinates of the crystal structures generated in this study have been deposited in the RCSB Protein Data Bank under the following accession codes: 7RYL <https://doi.org/10.2210/pdb7RYL/pdb> (CO3 binary), 7RYM <https://doi.org/10.2210/pdb7RYM/pdb> (CO3-CD1a-endo), 7RYN <https://doi.org/10.2210/pdb7RYN/pdb> (CO3-CD1a-sulfatide), 7RYO <https://doi.org/10.2210/pdb7RYO/pdb> (CO3-CD1a-DDM). The structural data used for molecular replacement in this study are available in the RCSB Protein Data Bank under accession codes 4X6B (<https://doi.org/10.2210/pdb4X6B/pdb>) and 7KP1 (<https://doi.org/10.2210/pdb7KP1/pdb>).

## Field-specific reporting

Please select the one below that is the best fit for your research. If you are not sure, read the appropriate sections before making your selection.

☒ Life sciences ☐ Behavioural & social sciences ☐ Ecological, evolutionary & environmental sciences

For a reference copy of the document with all sections, see [nature.com/documents/nr-reporting-summary-flat.pdf](https://www.nature.com/documents/nr-reporting-summary-flat.pdf)

## Life sciences study design

All studies must disclose on these points even when the disclosure is negative.

|                 |                                                                                                                                                                                                                                      |
|-----------------|--------------------------------------------------------------------------------------------------------------------------------------------------------------------------------------------------------------------------------------|
| Sample size     | In single-molecule imaging, single T cell sample size was kept at $n \geq 30$ , sufficient for reporting statistical significance. For SPR binding all experiments were performed $n \geq 2$ times with 2 technical replicates each. |
| Data exclusions | No data points were excluded                                                                                                                                                                                                         |
| Replication     | All experiments were carried out at least twice. All attempts at replication were successful.                                                                                                                                        |
| Randomization   | Randomization was not relevant in the study because our experiments did not require allocation into groups.                                                                                                                          |
| Blinding        | Quantifiable data was directly generated from the instruments, hence blinding investigator is not necessary                                                                                                                          |

## Reporting for specific materials, systems and methods

We require information from authors about some types of materials, experimental systems and methods used in many studies. Here, indicate whether each material, system or method listed is relevant to your study. If you are not sure if a list item applies to your research, read the appropriate section before selecting a response.

### Materials & experimental systems

| n/a                                 | Involved in the study                                           |
|-------------------------------------|-----------------------------------------------------------------|
| <input type="checkbox"/>            | <input checked="" type="checkbox"/> Antibodies                  |
| <input type="checkbox"/>            | <input checked="" type="checkbox"/> Eukaryotic cell lines       |
| <input checked="" type="checkbox"/> | <input type="checkbox"/> Palaeontology and archaeology          |
| <input checked="" type="checkbox"/> | <input type="checkbox"/> Animals and other organisms            |
| <input type="checkbox"/>            | <input checked="" type="checkbox"/> Human research participants |
| <input checked="" type="checkbox"/> | <input type="checkbox"/> Clinical data                          |
| <input checked="" type="checkbox"/> | <input type="checkbox"/> Dual use research of concern           |

### Methods

| n/a                                 | Involved in the study                              |
|-------------------------------------|----------------------------------------------------|
| <input checked="" type="checkbox"/> | <input type="checkbox"/> ChIP-seq                  |
| <input type="checkbox"/>            | <input checked="" type="checkbox"/> Flow cytometry |
| <input checked="" type="checkbox"/> | <input type="checkbox"/> MRI-based neuroimaging    |

## Antibodies

|                 |                                                                                                                                                                                                                                                                                                                             |
|-----------------|-----------------------------------------------------------------------------------------------------------------------------------------------------------------------------------------------------------------------------------------------------------------------------------------------------------------------------|
| Antibodies used | CD3-brilliant violet (BV)421 (UCHT1; Biolegend), CD3-Fluorescein isothiocyanate (FITC) (SK7; BD Bioscience), CD3-allophycocyanin (APC; SP34-2, BD Biosciences), abTCR-phycoerythrin (PE) or FITC (clone T10B9, BD), gdTCR-PE (B1, Biolegend), CD69-BV650 (FN50, BioLegend). PE anti-human CD1a Antibody (Biolegend, HI149). |
| Validation      | For the validation and titration of anti-CD3, -abTCR, -gdTCR, and -CD69 antibodies, PBMC were used. For the validation and titration of anti-CD1a, established stably transfected K562 cell lines were used as described in de Jong et al., Nat Imm 2010.                                                                   |

## Eukaryotic cell lines

Policy information about [cell lines](#)

|                          |                                                                                                                                                                                              |
|--------------------------|----------------------------------------------------------------------------------------------------------------------------------------------------------------------------------------------|
| Cell line source(s)      | HEK293T cells, parental K562 cells and the parental Jurkat cell lines were from ATCC. Transduced K562 and Jurkat cell lines were generated and validated in house.                           |
| Authentication           | Jurkat76 cell lines were checked for TCR expression by staining with antiCD3 antibody<br>K562 cell line stably expressing CD1a was tested by staining with PE anti-human CD1a antibody       |
| Mycoplasma contamination | Both parental cell lines, Jurkat76 and K562, tested negative for mycoplasma contamination before they were stably transduced. HEK293T are routinely tested for mycoplasma and were negative. |

Commonly misidentified lines  
(See [ICLAC](#) register)

There were no commonly misidentified cell lines used in this study.

## Human research participants

Policy information about [studies involving human research participants](#)

Population characteristics

We used discarded, de-identified leukoreduction collars provided by the Brigham and Women's Hospital Specimen Bank. We did not receive any data with the samples (including age, gender) so we do not know population characteristics.

Recruitment

These discarded samples were from random blood bank donors and not recruited specifically for this study.

Ethics oversight

These studies were approved by the Partners Healthcare Institutional Review Board.

Note that full information on the approval of the study protocol must also be provided in the manuscript.

## Flow Cytometry

### Plots

Confirm that:

- ☒ The axis labels state the marker and fluorochrome used (e.g. CD4-FITC).
- ☒ The axis scales are clearly visible. Include numbers along axes only for bottom left plot of group (a 'group' is an analysis of identical markers).
- ☒ All plots are contour plots with outliers or pseudocolor plots.
- ☒ A numerical value for number of cells or percentage (with statistics) is provided.

### Methodology

Sample preparation

Jurkat76 and K562 cells were harvested and washed twice in phosphate buffered saline (PBS). Cells were then incubated with 1:500 diluted Zombie Aqua Fixable Viability Kit (cat. no. 423101, BioLegend, CA, USA) for 10 minutes (min) at room temperature (RT). Cells were washed in FACS buffer (i.e. PBS supplemented with 2% foetal calf serum (FCS) and 0.04 Sodium Azide (both Sigma-Aldrich, MO, USA) and stained with anti-human CD3-APC (clone SP34-2, cat. no. 557597) and CD69-BV650 (clone FN50, cat. no. 563835, both BD Biosciences, CA, USA) for 15 min on ice. After a wash in FACS buffer, they were fixed using IC Fixation Buffer (ThermoFisher Scientific) for 10 min at RT and washed.

Human peripheral blood mononuclear cells (PBMC), T cell lines and TCR-transfected 293T cells were stained with tetramers at 2 ug/ml in phosphate buffered saline (PBS) containing 1% bovine serum albumin (BSA) and 0.01% sodium azide. Cells and tetramer were incubated for 10 min at room temperature, followed by addition of unlabeled anti CD3 monoclonal antibody (OKT3) to a final concentration of 2 mg/ml for 10 min at room temperature, followed by addition of labelled antibodies and another incubation for 10 min at room temperature, followed by 10 min at 4 °C.

Instrument

Samples were acquired on a Fortessa X20 (BD Biosciences)

Software

Data was analysed in FlowJo (version 10.8.1; Treestar & BD Biosciences)

Cell population abundance

The number of sorted cells was too low for purity analysis directly post sorting. Cells were expanded as described before they were analysed after sorting. Sorting and post-sort analyses are shown in Fig. 1a, including the gate that was used to determine abundance.

Gating strategy

T cell activation assays: FSC-A/SSC-A > Singlets using FSC-A/FSC-H > Viable cells using FSC-A/Zombie Aqua > Cell Trace negative cells using FSC-A/Cell Trace > GFP positive cells using FSC-A/GFP > CD69/CD3  
Tetramer-based sorting: FSC-A/SSC-A > Singlets using FSC-W/FSC-H > Singlets using SSC-W/SSC-H > gd T cells using CD3/abTCR

- ☒ Tick this box to confirm that a figure exemplifying the gating strategy is provided in the Supplementary Information.
